# Supplementary material for: Cascading network failure across the Alzheimer’s disease spectrum
Source: PubMed Central journal article supplement — Brain. 2015 Nov 19;139(2):547–62. doi: 10.1093/brain/awv338 (PMC4805086; doi:10.1093/brain/awv338), 2015-11-19
Supplement: 22d7f325401210910af2fecd7cb25926_brain-2015-00698-File003.pdf [file 22d7f325401210910af2fecd7cb25926_brain-2015-00698-File003.pdf]

| LONISID | LONIUID | IMAGEUID |
|---------|---------|----------|
| 27508   | 88453   | 180734   |
| 28701   | 91524   | 191820   |
| 28801   | 91779   | 192250   |
| 29286   | 93293   | 196434   |
| 29405   | 93682   | 199197   |
| 29568   | 94229   | 202425   |
| 29986   | 95701   | 207341   |
| 31703   | 100496  | 220070   |
| 32038   | 101642  | 223896   |
| 32471   | 103166  | 226190   |
| 33016   | 105083  | 228872   |
| 33521   | 107318  | 232243   |
| 33666   | 108100  | 233437   |
| 33850   | 108836  | 234917   |
| 33911   | 109060  | 235238   |
| 34297   | 110443  | 238542   |
| 34310   | 110474  | 238623   |
| 34751   | 111991  | 240811   |
| 34765   | 112049  | 240902   |
| 35323   | 114047  | 243902   |
| 35907   | 116155  | 246871   |
| 36157   | 117116  | 248233   |
| 36207   | 117301  | 248516   |
| 36418   | 117736  | 249144   |
| 36478   | 117928  | 249406   |
| 36514   | 118014  | 249536   |
| 36869   | 119185  | 251176   |
| 37378   | 121167  | 254581   |
| 37514   | 121613  | 255309   |
| 37516   | 121619  | 255318   |
| 37623   | 122028  | 255986   |
| 37862   | 122882  | 257271   |
| 38098   | 123809  | 258605   |
| 38143   | 123975  | 258955   |
| 38187   | 124246  | 259332   |
| 38304   | 124483  | 259654   |
| 38312   | 124509  | 259691   |
| 38477   | 125082  | 260580   |
| 39210   | 127663  | 264214   |
| 39632   | 128993  | 266129   |
| 39648   | 129050  | 266208   |
| 39735   | 129400  | 266634   |
| 39997   | 130239  | 267713   |
| 40022   | 130329  | 267894   |
| 40166   | 131095  | 268917   |
| 40173   | 131110  | 268925   |
| 40256   | 131342  | 269256   |
| 40262   | 131363  | 269279   |
| 40816   | 133337  | 272223   |

|       |        |        |
|-------|--------|--------|
| 41033 | 134159 | 273503 |
| 41750 | 136868 | 278493 |
| 41810 | 137141 | 278818 |
| 41867 | 137368 | 279103 |
| 41949 | 137668 | 279468 |
| 42110 | 138335 | 280365 |
| 42168 | 138530 | 280778 |
| 42209 | 138685 | 281024 |
| 42336 | 139147 | 281887 |
| 42354 | 139222 | 282008 |
| 42483 | 139652 | 282646 |
| 42587 | 140018 | 283264 |
| 42715 | 140457 | 283879 |
| 42955 | 141311 | 285812 |
| 43323 | 142415 | 287650 |
| 43389 | 142610 | 287992 |
| 43578 | 143363 | 289331 |
| 43600 | 143462 | 289559 |
| 43709 | 143854 | 290305 |
| 43769 | 144047 | 290644 |
| 43783 | 144084 | 290815 |
| 44566 | 146811 | 296769 |
| 44581 | 146864 | 296863 |
| 44732 | 147334 | 297689 |
| 44828 | 147611 | 298266 |
| 44981 | 148085 | 300043 |
| 44985 | 148095 | 300057 |
| 44992 | 148117 | 300088 |
| 45024 | 148209 | 300334 |
| 45062 | 148322 | 300529 |
| 45238 | 148884 | 301395 |
| 45652 | 150362 | 303731 |
| 45717 | 150623 | 304675 |
| 46008 | 151554 | 306375 |
| 46074 | 151778 | 306672 |
| 46106 | 151916 | 306889 |
| 46241 | 152428 | 307555 |
| 46897 | 154973 | 311921 |
| 47052 | 155582 | 312870 |
| 47525 | 157248 | 315850 |
| 47556 | 157371 | 316009 |
| 47669 | 157760 | 316519 |
| 47676 | 157772 | 316542 |
| 47796 | 158189 | 317121 |
| 47944 | 158713 | 319132 |
| 47979 | 158872 | 319541 |
| 48290 | 159829 | 322000 |
| 48301 | 159875 | 322060 |
| 48554 | 160821 | 323796 |
| 51793 | 165995 | 330141 |

|       |        |        |
|-------|--------|--------|
| 52313 | 167507 | 334140 |
| 52601 | 168410 | 336199 |
| 52772 | 169010 | 337131 |
| 53051 | 169762 | 338289 |
| 53276 | 170411 | 339436 |
| 53309 | 170527 | 339635 |
| 53712 | 171805 | 341793 |
| 53808 | 172135 | 342278 |
| 53819 | 172171 | 342326 |
| 54004 | 172866 | 343366 |
| 54123 | 173248 | 343912 |
| 54411 | 174287 | 346237 |
| 54664 | 175138 | 347402 |
| 54943 | 175870 | 348491 |
| 55314 | 177127 | 350735 |
| 56067 | 179913 | 354654 |
| 56477 | 181276 | 357475 |
| 56701 | 182012 | 358777 |
| 56870 | 182442 | 360323 |
| 57588 | 185430 | 364799 |
| 57624 | 185640 | 365086 |
| 57650 | 185780 | 365276 |
| 58022 | 187719 | 368413 |
| 58171 | 188307 | 369264 |
| 59119 | 191749 | 375698 |
| 59458 | 193619 | 378490 |
| 59744 | 195293 | 380899 |
| 59816 | 195651 | 381475 |
| 60340 | 197623 | 385101 |
